# Supplementary material
Source: publisher site journal article supplement (https://www.dovepress.com/article/354655)
Supplement: Supplementary file 1 [file get_supplementary_file.php]

**Supplementary Table. Associations between menstrual alterations and sociodemographic characteristics, self-reported health, among all participants, participants with no history of COVID-19 and participants diagnosed with COVID-19 (N=9,232), excluding participants with gynecological conditions and those using hormonal contraceptives**

|  | **All participants**  **(N=9,232)** | | **No history of COVID-19**  **(N=7,352)** | | **COVID-19 diagnosis**  **(N=1,154)** | |
| --- | --- | --- | --- | --- | --- | --- |
|  | **aOR (95%CI)** | **p value** | **aOR (95%CI)** | **p value** | **aOR (95%CI)** | **p value** |
| **Age**  18-25  26-35  36-45  46-55 | 1.00  0.79 (0.69-0.90)  0.74 (0.63-0.87)  0.81 (0.66-1.00) | <0.001  <0.001  0.055 | 1.00  0.78 (0.67-0.90)  0.75 (0.62-0.89)  0.81 (0.64-1.03) | 0.001  0.001  0.084 | 1.00  0.88 (0.60-1.29)  0.69 (0.44-1.10)  0.82 (0.45-1.48) | 0.516  0.116  0.505 |
| **Country of birth**  Spain  Other | 1.00  1.19 (0.96-1.47) | 0.118 | 1.00  1.16 (0.91-1.48) | 0.241 | 1.00  1.39 (0.74-2.61) | 0.309 |
| **Administrative situation**  Spanish nationality  Other administrative situation | 1.00  0.94 (0.72-1.23) | 0.670 | 1.00  0.93 (0.68-1.25) | 0.619 | 1.00  0.73 (0.34-1.55) | 0.416 |
| **Employment situation**  Working full-time/part-time  Self-employed  Studying full-time/part-time  On benefits (unemployment, COVID19, retirement and other)  Unpaid carer/houseworker | 1.07 (0.95-1.22)  1.08 (0.90-1.30)  1.06 (0.94-1.21)  1.06 (0.89-1.26)  1.18 (0.94-1.49) | 0.277  0.396  0.341  0.536  0.147 | 1.14 (0.99-1.31)  1.12 (0.91-1.37)  1.13 (0.98-1.31)  1.16 (0.95-1.41)  1.24 (0.95-1.61) | 0.079  0.295  0.088  0.144  0.111 | 0.89 (0.61-1.29)  1.17 (0.67-2.02)  1.00 (0.7-1.44)  0.84 (0.49-1.43)  0.71 (0.37-1.35) | 0.547  0.587  0.991  0.519  0.295 |
| **Completed education**  Primary education  Secondary education  University education | 1.00  1.34 (0.84-2.13)  1.50 (0.94-2.39) | 0.225  0.087 | 1.00  1.37 (0.82-2.28)  1.66 (1.00-2.75) | 0.229  0.052 | 1.00  0.53 (0.11-2.47)  0.42 (0.09-1.97) | 0.418  0.273 |
| **Carer**  No  Yes | 1.00  0.81 (0.71-0.92) | 0.001 | 1.00  0.8 (0.69-0.92) | 0.002 | 1.00  0.86 (0.59-1.25) | 0.424 |
| **Financial problems <12 months**  Never  Some/A few times  Always/Many times | 1.00  1.34 (1.21-1.47)  1.76 (1.53-2.03) | <0.001  <0.001 | 1.00  1.36 (1.22-1.51)  1.75 (1.49-2.05) | <0.001  <0.001 | 1.00  1.39 (1.05-1.84)  1.83 (1.19-2.80) | 0.020  0.006 |
| **Self-perceived health**  Excellent  Very good  Good  Fair  Poor | 1.00  1.15 (0.96-1.37)  1.44 (1.20-1.71)  1.99 (1.58-2.49)  2.02 (1.17-3.48) | 0.125  <0.001  <0.001  0.011 | 1.00  1.05 (0.86-1.28)  1.31 (1.08-1.59)  1.77 (1.37-2.27)  1.69 (0.90-3.16) | 0.622  0.006  <0.001  0.103 | 1.00  1.67 (0.96-2.89)  1.94 (1.11-3.39)  2.67 (1.34-5.32)  2.74 (0.41-18.06) | 0.069  0.019  0.005  0.296 |
| **COVID-19**  No COVID-19  COVID-19  **COVID-19**  No COVID-19  Suspected COVID-19  Covid-19 Diagnosis  **COVID-19**  No COVID-19 COVID-19 (no long COVID-19)  Long COVID-19 | 1.00  1.04 (0.94-1.16)  1.00  1.08 (0.92-1.26)  1.02 (0.90-1.17)  1.00  0.98 (0.88-1.11)  1.27 (1.04-1.55) | 0.418  0.364  0.708  0.788  0.018 |  |  |  |  |

aOR: adjusted odds ratios
